# Social interactions impact on the dopaminergic system and drive

## individuality

**Authors:** N. Torquet<sup>1</sup>, F. Marti<sup>1</sup>, C. Campart<sup>1</sup>, S. Tolu<sup>1</sup>, C. Nguyen<sup>1</sup>, V. Oberto<sup>1</sup>, J. Naudé<sup>1</sup>, S. Didienne<sup>1</sup>, S. Jezequel<sup>3-4</sup>, L. Le Gouestre<sup>3-4</sup>, N. Debray<sup>2-4</sup>, A. Mourot<sup>1</sup>, J. Mariani<sup>2-4</sup>, P. Faure<sup>1\*</sup>

### **Affiliations:**

<sup>1</sup> Sorbonne Universités, UPMC Univ Paris 06, INSERM, CNRS, Neuroscience Paris Seine - Institut de Biologie Paris Seine (NPS - IBPS), 75005 Paris, France

<sup>2</sup> Sorbonne Universités, UPMC Univ Paris 06, INSERM, CNRS, Biological Adaptation and Ageing - Institut de Biologie Paris Seine (B2A - IBPS), 75005 Paris, France

<sup>3</sup> Sorbonne Universités, UPMC Univ Paris 06, INSERM, CNRS UMS, 28 Phénotypage du Petit Animal, 75005 Paris, France

<sup>4</sup> APHP Hôpital Charles Foix, DHU Fast, Institut de la Longévité, 94205 Ivry-Sur-Seine, France

\* correspondence should be addressed P.F. ([phfaure@gmail.com](mailto:phfaure@gmail.com))

## 19 **Summary**

20 Individuality is a ubiquitous and well-conserved feature among animal species. The  
21 behavioral patterns of individual animals affect their respective role in the ecosystem and  
22 their prospects for survival. Even though some of the factors shaping individuality have been  
23 identified, the mechanisms underlying individuation are poorly understood and are generally  
24 considered to be genetics-based. Here we devised a large environment where mice live  
25 continuously, and observed that individuality, measured by both social and individual traits,  
26 emerged and settled within the group. Midbrain dopamine neurons underwent  
27 neurophysiological adaptations that mirrored this phenotypic divergence in individual  
28 behaviors. Strikingly, modifying the social environment resulted in a fast re-adaptation of  
29 both the animal's personality and its dopaminergic signature. These results indicate that  
30 individuality can rapidly evolve upon social challenges, and does not just depend on the  
31 genetic or epigenetic initial status of the animal.

## 32 **Introduction**

33 Individuality, or personality, refers to differences that remain stable over time and contexts  
34 for a series of behavioral traits expressed among individuals of the same species (Bach, 2009;  
35 Bergmüller and Taborsky, 2010; Duckworth, 2010; Sih et al., 2004; Wolf and Weissing,  
36 2010). Individuality is a ubiquitous feature of animal populations (Pennisi, 2016). Evidence  
37 for phenotypic variability lead to extensive research on its adaptive significance and its  
38 ecological or evolutionary consequences (Dall et al., 2012; Gosling, 2001; Réale et al., 2007;  
39 Sih et al., 2004; van Overveld et al., 2013; Wolf and Weissing, 2010). Even though the  
40 proximal mechanisms underlying phenotypic variability could provide important information  
41 on the mechanisms underlying animal choices, stress responses or susceptibilities to disease,  
42 they have been understudied (Duckworth, 2010).

43 The emergence of animal personality has been linked to genetic and environmental  
44 interactions (Lynch and Kemp, 2014; Pennisi, 2016). Experiments with groups of near-clonal  
45 mice reared in a large and controlled environment have demonstrated behavioral divergence  
46 (Freund et al., 2013; Hager et al., 2014), which may emerge from the magnification of small  
47 initial differences in the epigenetic status or micro-environment of the animal (Lynch and  
48 Kemp, 2014). In this perspective, the combination of individual history and initial differences  
49 would form a unique path for each individual, and may explain the phenotypic variability  
50 observed at the population level. Social relationships are another factor with potential  
51 important roles in personality shaping. Notably, social stress studies identified susceptible and  
52 resilient animals (Berton et al., 2006; Krishnan et al., 2007), while social hierarchy analyses  
53 revealed that dominant animals are seemingly less sensitive to the effects of drugs than  
54 subordinates (Morgan et al., 2002). Normal or pathological social relationships can thus  
55 greatly modify individual behaviors in mice. However, the role of social relationships in the  
56 emergence of phenotypic variability is poorly understood. Interactions within a group were

57 proposed to result in social specialization (Bergmüller and Taborsky, 2010), but whether the  
58 composition of a social group can affect non-social behavioral traits and the underlying  
59 neuronal processes remain to be determined.

60 Here we questioned the role of social relationships in the emergence of personality. For that  
61 purpose, we developed an experimental setup that combines an environment where animals  
62 live together, with a modular testing platform where animals are tested individually. In this  
63 environment, mice have individual access to specific feeding-related tasks while their social,  
64 circadian and cognitive behaviors are monitored continuously and for long periods of time  
65 using multiple sensors. This setup enabled the translation of activity and cognitive  
66 assessments into a definition of personality, and allowed to confirm the emergence of  
67 individuals with stable behavioral differences within a group of mice. Furthermore, we could  
68 demonstrate that individual's traits correlate with neuronal activity at the level of the  
69 decision-making dopamine (DA) system. Finally, manipulating the social network was  
70 sufficient to reset both the animal's personality and the activity of its DA cells. Altogether  
71 these data indicate that, in isogenic mice and for a conserved environment, social  
72 relationships govern individuality, most likely by impacting on the DAergic system.

73

## 74 **Results**

### 75 **Automatic analysis of behavior in a large and naturalistic environment**

76 Social life in natural environments and its consequences on the development of personality  
77 cannot be easily addressed in standardized behavioral laboratory tests. The development of  
78 automatic behavior analysis opens up new opportunities for in-depth phenotyping  
79 (Castelhano-Carlos et al., 2014; Endo et al., 2011; Krackow et al., 2010) and for studying  
80 individuation in the laboratory (Freund et al., 2013). An essential benefit of automation is the  
81 ability to conduct experiments on time scales that are orders of magnitude longer than

82 traditional experiments (from minutes in classical assays to months of observation in  
83 automated systems). To test whether the social environment modifies individual traits, we  
84 first developed a complex and automatized environment, called “Souris City”, where male  
85 mice live in a group (10 to 20) for extended periods of time (2-3 months) while performing  
86 cognitive tests. Souris City is composed of a large environment (Social cage) connected to a  
87 test-zone where individual animals, isolated from their conspecifics, performed a test (here a  
88 choice task in a T-maze to obtain water, Fig. 1A and Supplementary Fig. 1). Animals were  
89 RFID-tagged and detected by antennas. This led to a coherent representation of mouse  
90 trajectories and distribution within the different compartments of Souris City: the nest  
91 compartment (NC), food compartment (FC), central compartment (CC), stairs (St) and T-  
92 maze (Fig. 1A). The circadian rhythm of the group emerged from pooled (n=49 mice; 5  
93 experiments) activity measurement (Fig. 1B left). The time spent by mice in a given  
94 compartment generally varied from 1 to 30 min (Fig. 1B Right), with the shortest visits in FC,  
95 corresponding to feeding episodes. Conversely, very long stays (several hours) were found in  
96 NC, especially during the light time (Fig. 1C, see also Supplementary Fig. 2) and were  
97 associated with sleep episodes. These parameters described the general activity of the animals  
98 and can be used to construct more complex representations, such as the entropy of their  
99 distribution (see methods). Parameters describing group behavior can also be extracted,  
100 mainly using indicators that translate the simultaneous presence of a group of animals in a  
101 given space. As an example, a high rate of successive distinct RFID detections on a single  
102 antenna within short time intervals (<10 s) were indicative of social events, i.e. a group of  
103 mice passing from one compartment to another (Fig. 1D Left). Consecutive detections along  
104 different antennas (Fig. 1D Middle) indicated a follower tracking -or chasing- a leader (Fig.  
105 1D right).

106

## 107 **Evidence for the emergence of individual profiles in Souris City**

108 Long-term exposition to complex and large social environments was shown to elicit a  
109 magnification of individual differences in groups of genetically identical mice (Freund et al.,  
110 2013). In agreement with this previous report, we observed in Souris City i) a large variety of  
111 behaviors, including atypical ones (Fig. 2A-B), and ii) the progressive divergence of  
112 individual measures linked to space occupancy, such as the entropy of animal distribution  
113 (Fig. 2B left), the time spent in a given compartment (Fig. 2B right) or the time spent alone  
114 (Supplementary Fig. 3A). These observations suggest a marked consistency in individual  
115 behaviors over time, which defines personality. To further substantiate the emergence of  
116 individuality, we quantified behavioral correlations upon context variations. We performed  
117 five sessions (Fig. 2C left) in which both the rules to access drink dispensers and the drinking  
118 solutions were modified. Indeed, access to the T-maze, and thus to the drink dispensers, can  
119 be controlled by a gate allowing the selective entry of one mouse at a time (see  
120 Supplementary Fig. 1). During the habituation period (Ha), mice explored Souris City and  
121 had free access to water (gate always open). Then, access was gate-restricted and the reward  
122 associated with drink delivery was modified along four sessions: water on both sides (session  
123 S1), water or sucrose 5% (S2), water or nothing (S3) and finally back to water on both sides  
124 (S4). Overall, such manipulations altered the territorial organization in the social cage with  
125 variations of space occupancy in the nest and stair compartments throughout the different  
126 sessions (Fig. 2C Middle and Right, Supplementary Fig. 3B). The modification of average  
127 behaviors across contexts contrasted with the stability of individual behaviors. For instance,  
128 animals spending less time than their conspecifics in the stair compartment in S1  
129 correspondingly spent less time in this compartment in S2 (Fig. 2D), establishing a behavioral  
130 consistency throughout the experiment for any given animal. Similarly, a large set of  
131 behaviors showed strong homogeneity throughout the sessions, such as the animal inclination

132 to lead or follow in chasing episodes (Fig. 2E), the proportion of time spent alone (Fig. 2F), or  
133 additional social and non-social individual traits (Fig. 2G, Supplementary Fig. 3C). Overall,  
134 our results establish that mice developed individual profiles in this large environment, i.e.  
135 they maintained unique and coherent behavioral trajectories throughout time and situations.

136

### 137 **Different strategies of decision-making outside the group**

138 To refine individual description, we next addressed the relationship between social and non-  
139 social aspects of decision-making processes. In the T-maze with restricted access, mice  
140 voluntarily and individually performed a decision task, i.e. whether to make a left or right turn  
141 for accessing liquid reward. Once the choice for a particular arm (left or right) was made, the  
142 other arm closed off and the animal had to exit the test area for a new trial to begin  
143 (Supplementary Fig. 1D). The location of the different bottles was regularly swapped (every  
144 3-4 days). The animal had thus to continually probe the environment and to adjust its  
145 behavior in response to changes in rewarding outcomes. The occupancy rate in the T-maze  
146 reflects circadian rhythms. It reached approximately 80 % during the dark phase and dropped  
147 down to 20% during the light one (Fig. 3A). We then estimated, for the first 100 trials, the  
148 mean probability of choosing i) the left arm in S1, ii) sucrose in S2 and iii) water in S3. We  
149 found that mice preferentially chose the most rewarded side, i.e. sucrose for S2 and water for  
150 S3 (Fig. 3B). In S1, mice randomly opted for the two arms (i.e. 50% each) at the population  
151 level. The evolution of the probability to choose the best option after a bottle swap (Fig. 3B,  
152 green or blue curve) suggest a classical reinforcement learning process for tracking the best-  
153 rewarded side by trial-and-error. In addition, at the population level, mice showed a decreased  
154 return time after choosing the less-rewarded side (Supplementary Fig. 4A) and used a win-  
155 stay strategy: they chose the same side after finding the best-rewarded side with high  
156 probability, but virtually chose randomly (i.e. around 50%) after missing it (Fig. 3C). A closer

157 examination at the level of individual behaviors revealed that some mice did not alternate in  
158 S2 and thus failed to allocate their choices according to the location of the highest reward  
159 (Fig. 3D). To identify differences in behaviors, individual choice sequences were thus  
160 characterized by four variables that aimed to differentiate choice strategy. Two of these  
161 variables ( $\alpha$  and  $\beta$ ) were derived from modeling the choice sequence using a classical  
162 “softmax” model of reinforcement learning/decision-making. The other two (switch rate  
163 noted SW, and slope a) were directly estimated from the choice sequence (see methods).  
164 Principal component and clustering analysis distinguished three groups of mice (Fig. 3E): i)  
165 G1 mice, characterized by a low switch and virtually no alternation, which always visited the  
166 same arm independently of the reward location; ii) G2 mice, which are characterized by an  
167 intermediate behavior; and iii) G3 mice, which consistently switched to track higher rewards.  
168 The low (LS), intermediate (IS) and high switch (HS) rates of the animals were found to be  
169 good indicators for distinguishing the three groups (Fig. 3F). Although the behavior of LS  
170 mice may appear suboptimal, this population emerged in most experiments (mean  $\pm$  sem =  
171 22.1%  $\pm$  7.5, n=19/86 mice from 9 experiments).

172

### 173 **The activity of dopaminergic neurons correlated with individual profiles**

174 After having revealed the existence of various profiles in Souris City, we next aimed at  
175 linking cognitive performances in the T-maze with individual traits derived from spontaneous  
176 behaviors and with individual neurophysiological activities. Five groups of 10 mice were  
177 analyzed. We found that the SW obtained in S2 (Fig. 4A) correlated with other traits of social  
178 and non-social spontaneous behaviors (Fig. 4B). Notably, LS mice visited the test zone less  
179 frequently than the other groups (Fig. 4B Left) but spent more time in the food compartment  
180 (Fig. 4B Middle) or with groups of three or more congeners (Fig. 4B Right). We then assessed  
181 whether these phenotypical differences correlated with physiological alterations of specific



182 neural networks, and more specifically the mesolimbic DA system, which is often considered  
183 as an important player in personality neuroscience (DeYoung, 2013). Variations in DA have  
184 indeed been observed across behavioral traits (Marinelli and McCutcheon, 2014). Moreover,  
185 this pathway was shown to encode the rewarding properties of goal-directed behaviors,  
186 including social interaction (Gunaydin et al., 2014), and to be a key system in stress-related  
187 disorders and addiction (Robison and Nestler, 2011; Russo et al., 2012). Importantly, repeated  
188 social defeats produces strong and long-lasting changes within the mesolimbic DA pathway,  
189 leading to social withdrawal of defeated individuals (Barik et al., 2013; Berton et al., 2006).  
190 To address differences in the DA system between animals, we systematically recorded the  
191 activity of DA neurons following an experiment in Souris City. Mice were anesthetized and  
192 ventral tegmental area (VTA) DA cell activity was recorded using glass electrodes. DA cell  
193 firing was analysed with respect to the average firing rate and the percentage of spikes within  
194 bursts (see methods for burst quantification (Eddine et al., 2015; Faure et al., 2014; Ungless  
195 and Grace, 2012)). We first compared VTA DA cell activity in mice living in Souris City and  
196 in conspecifics living in a standard cage (StC). Both the firing frequency and the bursting  
197 activity of VTA DA cells were significantly lower in Souris City compared to StC (Fig. 4C  
198 left, Supplementary Fig. 5A-C). Furthermore, when analyzing separately the three groups of  
199 mice (LS, IS, HS), an inverted correlation between SW and both the frequency and bursting  
200 activity of VTA DA cells was observed (Fig. 4C middle and right, Supplementary Fig. 5D).  
201 These results demonstrate a biological inscription, at the level of the midbrain DA system, of  
202 the stable and distinctive patterns of behavioral activity that emerged in this complex  
203 environment.

204

205 **Social relationships determined both individual profiles and dopaminergic activity**

206 An important question remained, as whether these patterns were irreversible, i.e. related to  
207 intrinsic accumulated differences or, conversely, rapidly reversible. We addressed this issue  
208 by modifying the composition of two different groups of mice studied in parallel in two  
209 Souris City environments (Fig. 5A). During the sucrose versus water session, we used the  
210 median SW value to split mice from each Souris City in two populations: the lowest and  
211 highest switchers (Step 1). We then mixed the two populations and grouped the lowest  
212 switchers from the two environments together, and the highest switchers together. After three  
213 weeks of sucrose versus water, we re-evaluated the switching pattern for each mouse (Step 2).  
214 Interestingly, distinct switching profiles “re-emerged” within each of the two populations  
215 (HS, IS and LS), with no significant difference in the overall distribution of SW before and  
216 after mixing (Fig. 5B). Individually, mice that had been relocated (referred to as incomers) to  
217 an unknown Souris City decreased their SW (e.g. mouse number #5 in Fig. 5C) whereas mice  
218 that did not move (referred to as residents) increased their SW (e.g. mouse number #6 in Fig.  
219 5C). Variation of switching (i.e.  $SW_{\text{step2}} - SW_{\text{step1}}$ ) was higher in incomers than in residents  
220 (Fig. 5D). SW in step 1 was not predictive of SW in step 2: SW of the lowest switchers was  
221 homogenous in step 1 (Fig. 5E left) but greatly diverged in step 2, with a clear SW difference  
222 between residents and incomers (Fig. 5E right). Finally, we asked whether adaptation of SW  
223 was associated with a modification of VTA DA cell firing activity. DA neurons of incomers  
224 showed both higher firing rate and bursting activity than those of residents (Fig. 5F,  
225 Supplementary Fig. 6A). Altogether, these results suggest that the distinctive patterns of  
226 behavioral activity that emerged in this environment are rapidly reversible, and that social  
227 relationships can indeed shape behavior and affect the decision-making system.

228

## 229 **Discussion**

230

231 **Large environments and individuation**

232 Groups of mice have complex social structures (Crowcroft, 1966). Social interactions  
233 markedly influence a number of behaviors (Larrieu et al., 2017; Lathe, 2004), yet how they  
234 affect the development of inter individual variabilities have been rarely addressed in  
235 standardized tests. Numerous studies emphasize the needs of using large social housing  
236 environments, with automatic testing (Castelhano-Carlos et al., 2014; Sandi, 2008; Schaefer  
237 and Claridge-Chang, 2012; Tecott and Nestler, 2004; Vyssotski et al., 2002). Such  
238 environments have up until now been mainly used to evaluate strain differences (Endo et al.,  
239 2011; Krackow et al., 2010) or test the effect of specific perturbations such as stress on  
240 subgroups (Castelhano-Carlos et al., 2014). An essential benefit of automation is that it  
241 challenges the classical paradigms consisting in the analysis of average behaviors in distinct  
242 groups of animals observed on a short time scale, and puts forward the statistical analysis of  
243 individuals recorded in an ecological situation over long time scales. In a relatively stable  
244 context, genetically identical animals adjust their behavior over time and situations, yet only  
245 within a given range, defining individuality. The notion of individuality thus challenges the  
246 idea that behavior of an individual is plastic and thus able to adapt optimally to its  
247 environment (Bach, 2009; Bergmüller and Taborsky, 2010; Duckworth, 2010; Sih et al.,  
248 2004). For instance, the fact that in our setting two individuals could be classified as either  
249 high or low switchers necessarily implies consistency in their decision-making system, and  
250 may reflect a limitation to their respective range of adaptation. Our results suggest that this  
251 limitation is, on the one hand, strongly linked to local social rules, as evidenced by the  
252 experiment where we swapped social environments and, on the other hand, not influenced by  
253 local and immediate dynamic of social interactions, since the decision to switch is made in  
254 isolation from the congeners.

255

256 **Social determinism**

257 Initial variations on a small scale (developmental, epigenetic or micro-environmental) have  
258 been proposed to support phenotypic variations on a large scale (Freund et al., 2013; Stern et  
259 al., 2017). These small variations are believed to get amplified, resulting in a time-divergence  
260 of individual profiles, perhaps due to self-reinforcing effects of past experiences. In this  
261 framework, personality emerges slowly and gradually, from small-scale initial individual  
262 variations to generate unique phenotypical trajectories. These assumptions do not necessarily  
263 imply that personality remains unchanged throughout life (Caspi et al., 2005; MacDonald et  
264 al., 2006). Our data shed new light on the role of social behaviors as a factor of divergence  
265 contributing to a reorganization of behavior. Social relationships are likely able to amplify  
266 initial differences, but can also, as revealed here, trigger rapid and important reshaping of the  
267 animal personality and of its DA system, through the dynamic effects of interactions between  
268 individuals. These results are compatible with the concept of social niches, which offers an  
269 adaptive explanation of the emergence of individuality based on specialization (Bergmüller  
270 and Taborsky, 2010). Yet, they also support the idea of a key “social determinism”, in which  
271 individuation is decisively determined by social processes and originates from the restriction  
272 of the animal capacities to a specific repertoire.

273

274 **Specific role of Dopamine**

275 Variations in neuromodulatory functions, including those in the catecholamine and  
276 cholinergic systems, might contribute to the process of individuation (MacDonald et al., 2006;  
277 Stern et al., 2017). The DA produced in the VTA plays a role in a wide range of behaviors,  
278 from processing rewards and aversion to attention, motivation and motor control. The  
279 mesolimbic projections participate also in the modulation of social behaviors, as illustrated by  
280 genetics studies in human and physiological approaches in rodents (Gunaydin et al., 2014). In

281 the course of a social interaction, an animal must be able to rapidly choose the appropriate  
282 behavior, for approaching or avoiding a conspecific. Previous studies demonstrated that the  
283 DAergic system undergoes activity-dependent changes (Hyman et al., 2006) that are triggered  
284 by “events” occurring during the lifespan of an individual (Faure et al., 2014; Marinelli and  
285 McCutcheon, 2014) and that affect basal activity in the long term. The modifications of DA  
286 cell activity observed in Souris City may reflect consequences of “social events”. Indeed, it  
287 has been shown that the regulation of the DAergic transmission is sensitive to social-stress  
288 exposure (Ambroggi et al., 2009; Barik et al., 2013; Cao et al., 2010; Friedman et al., 2014;  
289 Morel et al., 2017). Alteration of DAergic activity has also been linked to many motor,  
290 motivational or cognitive dysfunctions. In particular, alteration of DA levels has been  
291 associated with variations in personality traits and, in the case of tonic DA, with  
292 exploration/exploitation trade-of or uncertainty seeking (Frank et al., 2009; Naudé et al.,  
293 2016). Furthermore, acutely manipulating VTA DA cell activity using optogenetics  
294 (Chaudhury et al., 2013) or pharmacology (Barik et al., 2013), in the context of repeated  
295 severe social stress, is sufficient to reverse social-induced stress avoidance. All these results  
296 suggest a causal relationship between variations of VTA DA cell activity and the expression  
297 of specific behaviors.

298

### 299 **Individuality and susceptibility to psychiatric disease**

300 Finally, our results open new perspectives for preclinical studies on rodent models. Preclinical  
301 models usually display high inter-individual variability, but do not focus on “individuals”. For  
302 instance, repeated social defeat in genetically identical mice leads to the appearance of  
303 depressive-like behavior only in a fraction of susceptible animals, but not in resilient  
304 (Krishnan et al., 2007; Russo et al., 2012). Our results indicate that social relationships  
305 modify behaviors and circuits in a way that mimics the effects of certain mutations or drugs.

306 The “Souris City” setup thus represents a unique opportunity to address causal relationships  
307 between cognitive performance in paradigms relevant for psychiatry and individual traits.  
308 Understanding how the social rules amplify the difference in behavioral spectrum displayed  
309 by otherwise identical animals will undoubtedly help unraveling the factors influencing the  
310 susceptibility of particular populations to psychiatric disorders.

311

## 312 **Materials and Methods**

313 **Animals.** 8 week-old male C57BL/6J mice were obtained from Charles Rivers Laboratories,  
314 France. All procedures were performed in agreement with the recommendations for animal  
315 experiments issued by the European Commission directives 219/1990 and 220/1990 and  
316 approved by the Comité d’Ethique En Expérimentation Animale n°26. All mice were  
317 implanted under anesthesia (isoflurane 3% – Iso-Vet, Piramal, UK), with an RFID chip  
318 subcutaneously inserted in the back.

319

## 320 **Souris City setup.**

321 **Setup:** “Souris City” combines a large environment (the social cage) where groups of male mice  
322 live for extended periods of time in semi-natural conditions, and a test-zone where mice have a  
323 controlled access to specific areas for drinking. Souris City was house-designed and built by  
324 TSE Systems (Germany). Mice were tagged with RFID chips, allowing automatic detection  
325 and controlled access to the different areas. Animals were living under a 12h/12h dark-light  
326 cycle (lights on at 7am) and had access to food ad libitum.

327 The social cage is divided into four compartments: NC, which contains a nest, FC where mice  
328 have free and uncontrolled access to food, CC and St to get access to the gate (Fig. 1A,  
329 Supplementary Fig. 1). NC, FC and CC are located in a 1m x 1m square, on which St is  
330 connected by a tube. These different compartments are equipped with RFID antennas on the

331 floor and are connected through tubes that are equally equipped with antennas. Therefore, each  
332 transition from one compartment to the other was associated with a detection of the animal by an  
333 antenna.

334 The social cage is connected to the test zone by a gate, which is a key element of the setup  
335 (Fig. 1A). The gate (TSE Systems, Germany) is composed of three doors with independent  
336 automatic control (Fig. Supplementary 1B), allowing to select animals and control their  
337 access to the test zone. Individuals thus performed the test alone (isolated from their  
338 congeners) and by themselves, *i.e.* whenever they wished to and without any intervention  
339 from the experimenter. The test consists in a T-maze choice task (Dember and Fowler, 1958).  
340 Since the T-maze was the only source of water, animals were motivated to perform the test.  
341 The T-maze gives access to two home-cages, one on each side (left and right), with a drinking  
342 bottle in each. The bottles contained either water, sucrose or were empty. The system was  
343 configured in such a way that animals performed a dynamic foraging task. The reward value  
344 of the bottle content could be changed, to evaluate whether mice were able to track the  
345 highest reward. Such automation of the task, by minimizing handling and the presence of the  
346 experimenter, prevents most limitations of human assessment (*i.e.* cost and time) and  
347 eliminates the risks of stress or disturbance of the animal natural cycle (Castelhano-Carlos et  
348 al., 2014; Sandi, 2008; Schaefer and Claridge-Chang, 2012; Spruijt and DeVisser, 2006).  
349 Simple rules were used to automatize the test. When a mouse accessed one feeder, the infra-  
350 red light beam was cut off in that arm, which triggered closing of the feeder on the other side  
351 (a Plexiglas cylinder drops in and prevents access to the bottle). Mice had to exit the T-maze  
352 to trigger re-opening of the feeders and hence to resume a new trial (Supplementary Fig. 1D).  
353 Bottles (for example sucrose- or water-containing) were swapped every 3-4 days.

354

355 **Event detection and storage:** Four different kinds of sensors provided automatic data  
356 registration in Souris City: RFID antennas surrounding the tubes that connect compartments  
357 together (n=14), the gate (n=1), infra-red beam sensors in the T-maze (n=4, 2 on each side)  
358 and RFID antennas on the floor (n=16). The IntelliMaze software (TSE Systems, Germany)  
359 ran the first three sensors, while TrafficCage (TSE Systems, Germany) controlled the floor  
360 RFID antennas. These two software programs worked completely independently. IntelliMaze  
361 registered a table (.txt file) for each sensor, where each line corresponds to a detection event  
362 with the information on animal identity (RFID tag), detection time (millisecond precision),  
363 antenna number for the tubes and animal direction for the gate. The TrafficCage software  
364 registered detection events as a raw file (.txt file) with the information of animal identity,  
365 detection time and antenna number. All these detection events were stored in a database  
366 (MySQL relational database hosted by an Apache server), together with spatial and temporal  
367 annotation allowing to track the position and activity for each mouse (i.e. mouse number,  
368 date, time, antenna number). A web interface coded in php imported the data from the files  
369 into the database, linked all the events to the appropriate mouse and created gate sessions. All  
370 these events constitute the basic data used for further analysis (see data analysis). R scripts  
371 (RMySQL package) were used to extract data from the database.

372

373 **Data Processing:** Detection events were used to build various indices and estimators of the  
374 animal behavior. The position of the animal was used to calculate its overall activity: i) the  
375 proportion of time spent in each compartment, ii) the density of transitions between  
376 compartments computed on 24 hours, binned by 10 min periods to evaluate the circadian  
377 rhythm, iii) the number of detections for each antenna, and iv) the entropy of each animal.  
378 Entropy was calculated from the proportion of time  $p$  spent in each compartment  $i$ :

379

$$Entropy = - \sum_i p_i \log(p_i)$$



380 The localization of a mouse relative to others was used to assess the social relationships  
381 between mice, e.g. the proportion of time spent alone, with one conspecific or more. We also  
382 used detections from both tubes and floor antennas to quantify “chasing episodes” between  
383 two mice. Chasing episodes were defined by concomitant (i.e. within a 5s window) detections  
384 of the same two mice on at least two consecutive antennas. Antennas were considered  
385 consecutive if the first mouse from a concomitant detection on one antenna was detected  
386 within a 30s window on another antenna (see Fig. 1.D for schematics). Cumulative curves  
387 (entropy and time spent in FC) over sessions represent data from dark phase section (from  
388 7pm to 7am the following day) summed with data from the dark section of the previous days.

389

390 ***The T-maze choice quantification:*** Individual choice sequences (i.e. left or right, Fig. 3) were  
391 characterized using four parameters: the switch rate (SW, see above), the slope of the left-  
392 right choice (a value close to 1 indicating no switching), the exploratory parameter ( $\beta$ ) and  
393 the learning rate parameter ( $\alpha$ ). We calculated SW for each animal as follows:

$$394 \quad \text{switch rate} = 100 - \left| \left( \left( \frac{\text{number of left side}}{\text{total number of trial}} \times 100 \right) - 50 \right) \times 2 \right|$$

395 A SW of 100% indicates that the mouse equally chose both sides, while a SW of 0% means  
396 that the mouse never switched and always chose the same side. Exploration/exploitation  
397 parameters were calculated by fitting the sequence of choices with a standard Reinforcement-  
398 Learning/Decision-making model. We used a classical softmax decision-making model where  
399 choices depend on the difference between the expected rewards of the two alternatives. This  
400 model formalizes the fact that the larger the difference in rewards is, the higher the probability  
401 to select the best option will be. Sensitivity to reward difference was formalized by the free  
402 parameter  $\beta$ . Expectation of reward was adapted through classical reinforcement-learning  
403 algorithm, i.e. trial and error, by comparison between the current estimate of action; with

404  $R$  (water) = 1,  $R$  (sucrose) = 2,  $R$  (nothing) = 0. The value  $V_i$  of each action  $i$  was updated by  
405  $V_i(t + 1) = V_i(t) + \alpha R(t)$ , where the free parameter  $\alpha$  formalizes the learning speed. The  
406 softmax choice rule was:

$$407 \quad P_i = \frac{\exp(\beta V_i)}{\sum_j \exp(\beta V_j)}$$

408 where  $\beta$  is an inverse temperature parameter reflecting the choice sensitivity to the difference  
409 between decision variables: high  $\beta$  corresponds to mice that often choose what they estimate  
410 the highest-value arm, while low  $\beta$  corresponds to random choice. The free parameters  $\alpha$  and  
411  $\beta$  were optimized using the log-likelihood of the model, on a choice-by-choice basis.

412

413

414 **Behavioral experiments:** The system consists in two parallel and identical setups (Fig.1A,  
415 Supplementary Fig. 1) enabling the analysis of up to 10 mice in each of them. In this study,  
416 15 experiments were performed, 12 of which were paired, i.e. executed in parallel in two  
417 independent setups. Two setups were coupled (at the St level) for a single experiment, which  
418 allowed the tracking of 18 mice. This experiment was used to illustrate some typical results  
419 on a larger group of mice (Fig. 2A-C). Overall, 141 mice were tested in Souris City.

420

421 ***In vivo* electrophysiological recordings:** Mice were anesthetized with an intraperitoneal  
422 injection of chloral hydrate (8%), 400 mg/kg, supplemented as required to maintain optimal  
423 anesthesia throughout the experiment, and positioned in a stereotaxic frame (David Kopf).  
424 Body temperature was kept at 37°C by means of a thermostatically controlled heating blanket.  
425 All animals had a catheter inserted into their saphenous vein for *i.v.* administrations of drugs.  
426 Recordings were performed using classical technics commonly used in the laboratory (Eddine  
427 et al., 2015; Morel et al., 2014). Briefly, recording electrodes were pulled with a Narishige  
428 electrode puller from borosilicate glass capillaries (Harvard Apparatus). The tips were broken

429 under a microscope. These electrodes had tip diameters of 1-2 mm and impedances of 20-50  
430 M $\Omega$ . A reference electrode was placed into the subcutaneous tissue. When a single unit was  
431 well isolated, the unit activity digitized at 12.5 kHz was stored in the Spike2 program  
432 (Cambridge Electronic Design, UK). The electrophysiological characteristics of VTA DA  
433 neurons were analyzed in the active cells encountered by systematically passing the  
434 microelectrode in a stereotaxically defined block of brain tissue including the VTA. Its  
435 margins ranged from 3 to 3.8 mm posterior to Bregma, 0.25 to 0.8 mm mediolateral with  
436 respect to Bregma, and 4.0 to 4.8 mm ventral to the cortical surface according to the  
437 coordinates of Paxinos and Franklin (Paxinos and Franklin, 2004). Sampling was initiated on  
438 the right side, and then on the left side. After a baseline recording of 10-15 minutes, the  
439 electrode was moved to find another cell. Extracellular identification of DA neurons was  
440 based on their location as well as on a set of unique electrophysiological properties that  
441 characterize these cells in vivo: (i) a typical triphasic action potential with a marked negative  
442 deflection; (ii) a characteristic long duration (>2.0 Ms); (iii) an action potential width from  
443 start to negative through > 1.1 Ms; (iv) a slow firing rate (<10 Hz and >1 Hz) with an  
444 irregular single spiking pattern and occasional short, slow bursting activity. These  
445 electrophysiological properties distinguish DA from non-DA neurons (Ungless and Grace,  
446 2012)

447

448 **DA cell firing analysis:** DA cell firing was analysed with respect to the average firing rate  
449 and the percentage of spikes within bursts (%SWB, number of spikes within burst divided by  
450 total number of spikes). Bursts were identified as discrete events consisting of a sequence of  
451 spikes such that their onset is defined by two consecutive spikes within an interval <80 ms  
452 and they terminated with an interval >160 ms (Eddine et al., 2015; Faure et al., 2014; Ungless  
453 and Grace, 2012).

454

455 **Statistics:** Data are presented as means  $\pm$  SEM with corresponding dot plots overlaid, as  
456 cumulative distribution function, or as boxplot. Data from electrophysiological recording  
457 (Fig. 4) are presented as barplot (mean $\pm$ sem) without dot plots, and their cumulative  
458 distributions are presented in supplementary figures (Supplementary Fig. 5 and 6). Statistics  
459 for behavioral experiments were carried out using R, a language and environment for  
460 statistical computing (2005, <http://www.r-project.org>). We used a one-way repeated-  
461 measures ANOVA followed by a t-test with Bonferroni correction for post hoc analysis to  
462 compare the time spent in each compartment through several sessions (Fig. 2C). Consistency  
463 over two sessions was estimated by Spearman correlation coefficient (Rho) between several  
464 measurements (e.g. proportion of time spent in the compartments) determined in session S1  
465 and S2 (Fig. 2 D, E, F, G). Probability of switching were evaluated using repeated trials (i.e.  
466 consecutive entries with a maximum of 20 seconds apart) and were compared using two-  
467 sample Wilcoxon test (Fig. 3C). We performed a clustering (bclust function from e1071  
468 package) and a Principal Component Analysis (PCA function from FactoMine package) to  
469 define three groups of mice from the T-maze scores (Fig. 3E). We used a one-way ANOVA  
470 followed by a Tukey test for post hoc analysis to compare the firing rate and the percentage of  
471 DA neuron spikes from LS, IS and HS mice (Fig. 4B). The firing rate and %SWB of DA  
472 neurons were compared using two-sample t.test or two-sample wilcoxon test (Fig. 4C Left) or  
473 one Way Anova followed by Tukey post-hoc test (Fig. 4C right). SW distribution in mice  
474 population were compared using two-sample Kolmogorov-Smirnov test (Fig. 4E left). We  
475 calculated the difference between the SW before and after mixing the mice and we compared  
476 the incomers with the residents with a t-test or a Wilcoxon test depending on the distribution  
477 normality (Fig. 4E right)). The firing rate and %SWB of DA neuron were compared between  
478 these two groups with a Wilcoxon test (Fig. 4F).

479 **Acknowledgements:**

480  
481 We thank J. Hazan, E. Ey and F. Tronche for critical reading of the manuscript. This work  
482 was supported by the Centre National de la Recherche Scientifique CNRS UMR 8246, the  
483 Foundation for Medical Research (FRM, Equipe FRM DEQ2013326488 to P.F.), the  
484 Bettencourt Schueller Foundation (Coup d'Élan 2012 to P.F.), the Ile de France region (Dim  
485 Cerveau et pensée to P.F.), the French National Cancer Institute Grant TABAC-16-022 (to  
486 P.F.) and The LabEx Bio-Psy. P.F. and J.M. laboratories are part of the École des  
487 Neurosciences de Paris Ile-de-France RTRA network. P.F. and J.M. are members of LabEx  
488 Bio-Psy and P.F. is member of DHU Pepsy.

489  
490 **Author Contributions:** N.T. and P.F. designed the study. N.T. and P.F. analyzed the  
491 behavioral data. F.M., S.T. and C.N. performed the electrophysiological recordings. C.C.,  
492 V.O., S.J., L.L.G and S.D. contributed to behavioral experiments. J.N. contributed to analyze  
493 the behavioral data. N.D. contributed to create a database. J.M. contributed to the design and  
494 the realization of the project. N.T., P.F. and A.M. wrote the manuscript.

495  
496 **Author Information:** The authors declare no competing financial interests. Correspondence  
497 should be addressed to [phfaure@gmail.com](mailto:phfaure@gmail.com).

498  
499 **References**

500  
501 Ambroggi, F., Turiault, M., Milet, A., Deroche-Gamonet, V., Parnaudeau, S., Balado, E.,  
502 Barik, J., van der Veen, R., Maroteaux, G., Lemberger, T., et al. (2009). Stress and addiction:  
503 glucocorticoid receptor in dopaminoceptive neurons facilitates cocaine seeking. *Nat Neurosci*  
504 *12*, 247–249.  
505 Bach, J.-F. (2009). The biological individual--the respective contributions of genetics,  
506 environment and chance. *Comptes Rendus-Biologies* *332*, 1065–1068.  
507 Barik, J., Marti, F., Morel, C., Fernandez, S.P., Lanteri, C., Godeheu, G., Tassin, J.-P.,  
508 Mombereau, C., Faure, P., and Tronche, F. (2013). Chronic stress triggers social aversion via  
509 glucocorticoid receptor in dopaminoceptive neurons. *Science* *339*, 332–335.

- 510 Bergmüller, R., and Taborsky, M. (2010). Animal personality due to social niche  
511 specialisation. *Trends Ecol. Evol. (Amst.)* 25, 504–511.
- 512 Berton, O., McClung, C.A., DiLeone, R.J., Krishnan, V., Renthal, W., Russo, S.J., Graham,  
513 D., Tsankova, N.M., Bolaños, C.A., Rios, M., et al. (2006). Essential role of BDNF in the  
514 mesolimbic dopamine pathway in social defeat stress. *Science* 311, 864–868.
- 515 Cao, J.-L., Covington, H.E., Friedman, A.K., Wilkinson, M.B., Walsh, J.J., Cooper, D.C.,  
516 Nestler, E.J., and Han, M.-H. (2010). Mesolimbic dopamine neurons in the brain reward  
517 circuit mediate susceptibility to social defeat and antidepressant action. *J Neurosci* 30, 16453–  
518 16458.
- 519 Caspi, A., Roberts, B.W., and Shiner, R.L. (2005). Personality development: stability and  
520 change. *Annu Rev Psychol* 56, 453–484.
- 521 Castelhana-Carlos, M., Costa, P.S., Russig, H., and Sousa, N. (2014). PhenoWorld: a new  
522 paradigm to screen rodent behavior. *Translational Psychiatry* 4, e399–11.
- 523 Chaudhury, D., Walsh, J.J., Friedman, A.K., Juarez, B., Ku, S.M., Koo, J.W., Ferguson, D.,  
524 Tsai, H.-C., Pomeranz, L., Christoffel, D.J., et al. (2013). Rapid regulation of depression-  
525 related behaviours by control of midbrain dopamine neurons. *Nature* 493, 532–536.
- 526 Crowcroft, P. (1966). Mice all over.
- 527 Dall, S., Bell, A.M., Bolnick, D.I., and Ratnieks, F. (2012). An evolutionary ecology of  
528 individual differences. *Ecol Letters*.
- 529 Dember, W.N., and Fowler, H. (1958). Spontaneous alternation behavior. *Psychological*  
530 *Bulletin* 55, 412–428.
- 531 DeYoung, C.G. (2013). The neuromodulator of exploration: A unifying theory of the role of  
532 dopamine in personality. 1–26.
- 533 Duckworth, R.A. (2010). Evolution of Personality: Developmental Constraints on Behavioral  
534 Flexibility. *The Auk* 127, 752–758.
- 535 Eddine, R., Valverde, S., Tolu, S., Dautan, D., Hay, A., Morel, C., Cui, Y., Lambomez, B.,  
536 Venance, L., Marti, F., et al. (2015). A concurrent excitation and inhibition of dopaminergic  
537 subpopulations in response to nicotine. *Sci. Rep.* 5, 8184.
- 538 Endo, T., Maekawa, F., Vöikar, V., Haijima, A., Uemura, Y., Zhang, Y., Miyazaki, W.,  
539 Suyama, S., Shimazaki, K., Wolfer, D.P., et al. (2011). Automated test of behavioral  
540 flexibility in mice using a behavioral sequencing task in IntelliCage. *221*, 172–181.
- 541 Faure, P., Tolu, S., Valverde, S., and Naudé, J. (2014). Role of nicotinic acetylcholine  
542 receptors in regulating dopamine neuron activity. *Neuroscience* 282C, 86–100.
- 543 Frank, M.J., Doll, B.B., Oas-Terpstra, J., and Moreno, F. (2009). Prefrontal and striatal  
544 dopaminergic genes predict individual differences in exploration and exploitation. *Nat*  
545 *Neurosci* 12, 1062–1068.
- 546 Freund, J., Brandmaier, A.M., Lewejohann, L., Kirste, I., Kritzler, M., Kruger, A., Sachser,

- 547 N., Lindenberger, U., and Kempermann, G. (2013). Emergence of Individuality in Genetically  
548 Identical Mice. *Science* 340, 756–759.
- 549 Friedman, A.K., Walsh, J.J., Juarez, B., Ku, S.M., Chaudhury, D., Wang, J., Li, X., Dietz,  
550 D.M., Pan, N., Vialou, V.F., et al. (2014). Enhancing depression mechanisms in midbrain  
551 dopamine neurons achieves homeostatic resilience. *Science* 344, 313–319.
- 552 Gosling, S.D. (2001). From mice to men: what can we learn about personality from animal  
553 research? *Psychological Bulletin*.
- 554 Gunaydin, L.A., Grosenick, L., Finkelstein, J.C., Kauvar, I.V., Fenno, L.E., Adhikari, A.,  
555 Lammel, S., Mirzabekov, J.J., Airan, R.D., Zalocusky, K.A., et al. (2014). Natural neural  
556 projection dynamics underlying social behavior. *Cell* 157, 1535–1551.
- 557 Hager, T., Jansen, R.F., Pieneman, A.W., Manivannan, S.N., Golani, I., van der Sluis, S.,  
558 Smit, A.B., Verhage, M., and Stiedl, O. (2014). Display of individuality in avoidance  
559 behavior and risk assessment of inbred mice. *Front. Behav. Neurosci.* 8, 314.
- 560 Hyman, S.E., Malenka, R.C., and Nestler, E.J. (2006). Neural mechanisms of addiction: the  
561 role of reward-related learning and memory. *Annu Rev Neurosci* 29, 565–598.
- 562 Krackow, S., Vannoni, E., Codita, A., Mohammed, A.H., Cirulli, F., Branchi, I., Alleva, E.,  
563 Reichelt, A., Willuweit, A., Voikar, V., et al. (2010). Consistent behavioral phenotype  
564 differences between inbred mouse strains in the IntelliCage. *Genes Brain Behav* 9, 722–731.
- 565 Krishnan, V., Han, M.-H., Graham, D.L., Berton, O., Renthal, W., Russo, S.J., Laplant, Q.,  
566 Graham, A., Lutter, M., Lagace, D.C., et al. (2007). Molecular adaptations underlying  
567 susceptibility and resistance to social defeat in brain reward regions. *Cell* 131, 391–404.
- 568 Larrieu, T., Cherix, A., Duque, A., Rodrigues, J., Lei, H., Gruetter, R., and Sandi, C. (2017).  
569 Hierarchical Status Predicts Behavioral Vulnerability and Nucleus Accumbens Metabolic  
570 Profile Following Chronic Social Defeat Stress. *Curr Biol* 27, 2202–2210.e2204.
- 571 Lathe, R. (2004). The individuality of mice. *Genes Brain Behav* 3, 317–327.
- 572 Lynch, K.E., and Kemp, D.J. (2014). Nature-via-nurture and unravelling causality in  
573 evolutionary genetics. *Trends Ecol. Evol. (Amst.)* 29, 2–4.
- 574 MacDonald, S.W.S., Nyberg, L., and Bäckman, L. (2006). Intra-individual variability in  
575 behavior: links to brain structure, neurotransmission and neuronal activity. *Tins* 29, 474–480.
- 576 Marinelli, M., and McCutcheon, J.E. (2014). Heterogeneity of dopamine neuron activity  
577 across traits and states. *Neuroscience* 282C, 176–197.
- 578 Morel, C., Fattore, L., Pons, S., Hay, Y.A., Marti, F., Lambomez, B., De Biasi, M., Lathrop,  
579 M., Fratta, W., Maskos, U., et al. (2014). Nicotine consumption is regulated by a human  
580 polymorphism in dopamine neurons. *Mol Psychiatry* 19, 930–936.
- 581 Morel, C., Fernandez, S.P., Pantouli, F., Meye, F.J., Marti, F., Tolu, S., Parnaudeau, S.,  
582 Marie, H., Tronche, F., Maskos, U., et al. (2017). Nicotinic receptors mediate stress-nicotine  
583 detrimental interplay via dopamine cells' activity. *Mol Psychiatry* 36, 1–9.

- 584 Morgan, D., Grant, K.A., Gage, H.D., Mach, R.H., Kaplan, J.R., Prioleau, O., Nader, S.H.,  
585 Buchheimer, N., Ehrenkaufer, R.L., and Nader, M.A. (2002). Social dominance in monkeys:  
586 dopamine D2 receptors and cocaine self-administration. *Nat Neurosci* 5, 169–174.
- 587 Naudé, J., Tolu, S., Dongelmans, M., Torquet, N., Valverde, S., Rodriguez, G., Pons, S.,  
588 Maskos, U., Mourot, A., Marti, F., et al. (2016). Nicotinic receptors in the ventral tegmental  
589 area promote uncertainty-seeking. *Nat Neurosci* 19, 471–478.
- 590 Paxinos, G., and Franklin, K.B.J. (2004). *The Mouse Brain in Stereotaxic Coordinates* (Gulf  
591 Professional Publishing).
- 592 Pennisi, E. (2016). The power of personality. *Science* 352, 644–647.
- 593 Réale, D., Reader, S.M., Sol, D., McDougall, P.T., and Dingemanse, N.J. (2007). Integrating  
594 animal temperament within ecology and evolution. *Biological Reviews* 82, 291–318.
- 595 Robison, A.J., and Nestler, E.J. (2011). Transcriptional and epigenetic mechanisms of  
596 addiction. *Nat Rev Neurosci* 12, 623–637.
- 597 Russo, S.J., Murrough, J.W., Han, M.-H., Charney, D.S., and Nestler, E.J. (2012).  
598 Neurobiology of resilience. *Nat Neurosci* 15, 1475–1484.
- 599 Sandi, C. (2008). Understanding the neurobiological basis of behavior: a good way to go.  
600 *Frontiers in Neuroscience* 2, 129–130.
- 601 Schaefer, A.T., and Claridge-Chang, A. (2012). The surveillance state of behavioral  
602 automation. *Curr Opin Neurobiol* 22, 170–176.
- 603 Sih, A., Bell, A., and Johnson, J.C. (2004). Behavioral syndromes: an ecological and  
604 evolutionary overview. *Trends Ecol. Evol. (Amst.)* 19, 372–378.
- 605 Spruijt, B.M., and DeVisser, L. (2006). Advanced behavioural screening: automated home  
606 cage ethology. *Drug Discovery Today: Technologies* 3, 231–237.
- 607 Stern, S., Kirst, C., and Bargmann, C.I. (2017). Neuromodulatory Control of Long-Term  
608 Behavioral Patterns and Individuality across Development. *Cell* 171, 1–25.
- 609 Tecott, L.H., and Nestler, E.J. (2004). Neurobehavioral assessment in the information age.  
610 *Nat Neurosci* 7, 462–466.
- 611 Ungless, M.A., and Grace, A.A. (2012). Are you or aren't you? Challenges associated with  
612 physiologically identifying dopamine neurons. *Tins* 35, 422–430.
- 613 van Overveld, T., Adriaensen, F., Matthysen, E., and Korsten, P. (2013). Genetic integration  
614 of local dispersal and exploratory behaviour in a wild bird. *Nature Communications* 4, 1–7.
- 615 Vyssotski, A.L., Dell'Omo, G., Poletaeva, I.I., Vyssotsk, D.L., Minichiello, L., Klein, R.,  
616 Wolfer, D.P., and Lipp, H.-P. (2002). Long-term monitoring of hippocampus-dependent  
617 behavior in naturalistic settings: mutant mice lacking neurotrophin receptor TrkB in the  
618 forebrain show spatial learning but impaired behavioral flexibility. *Hippocampus* 12, 27–38.
- 619 Wolf, M., and Weissing, F.J. (2010). An explanatory framework for adaptive personality



620 differences. *Philos Trans R Soc Lond, B, Biol Sci* 365, 3959–3968.

621

622 **Fig. 1: The Souris City environment:** (A) Souris City setup with connectable compartments,  
623 gates and antennas. The setup is divided in two main parts: a social cage and a test zone. The  
624 social cage is divided in four compartments: NC, which contains a nest, FC where mice have  
625 free and uncontrolled access to food, CC and a stair (St) to get access to the gate  
626 (Supplementary Fig. 1). NC, FC and CC are located in a 1m x 1m square, on which St is  
627 connected by a tube. Mice are tagged with RFID chips and detected by floor or tubes RFID  
628 antennas. A gate separates the test zone (here a T-maze) from the social cage. Two infra-red  
629 beams (red dashed line) are used to detect mice in the T-maze. (B) (Left) Histogram of all the  
630 detection events from tubes (10 min time bins). (Right) Distribution of the time spent in each  
631 compartment (log-scale, bandwidth=0.1). (C) Circular plots showing the starting time (on a  
632 24h dial) and duration (log distance of the point to the center) of each visit (a dot) for NC and  
633 FC. Three circles indicate the 15' (blue), 1h (red) and 10h (green) limits. (D) Analysis of  
634 social behavior: (Left) Peri-event time histogram (PETH density, bandwidth = 2s) of  
635 detections from distinct mice on the same tube antenna, showing a delay between transitions  
636 lower than 10s. (Middle) Chasing episodes are defined by concomitant detections of the same  
637 two mice on at least two consecutive antennas. (Right) Follower and leader mice, based on  
638 the ratio between the number of leads over the number of follows. n=49 mice from 5  
639 experiments.

# Figure 1

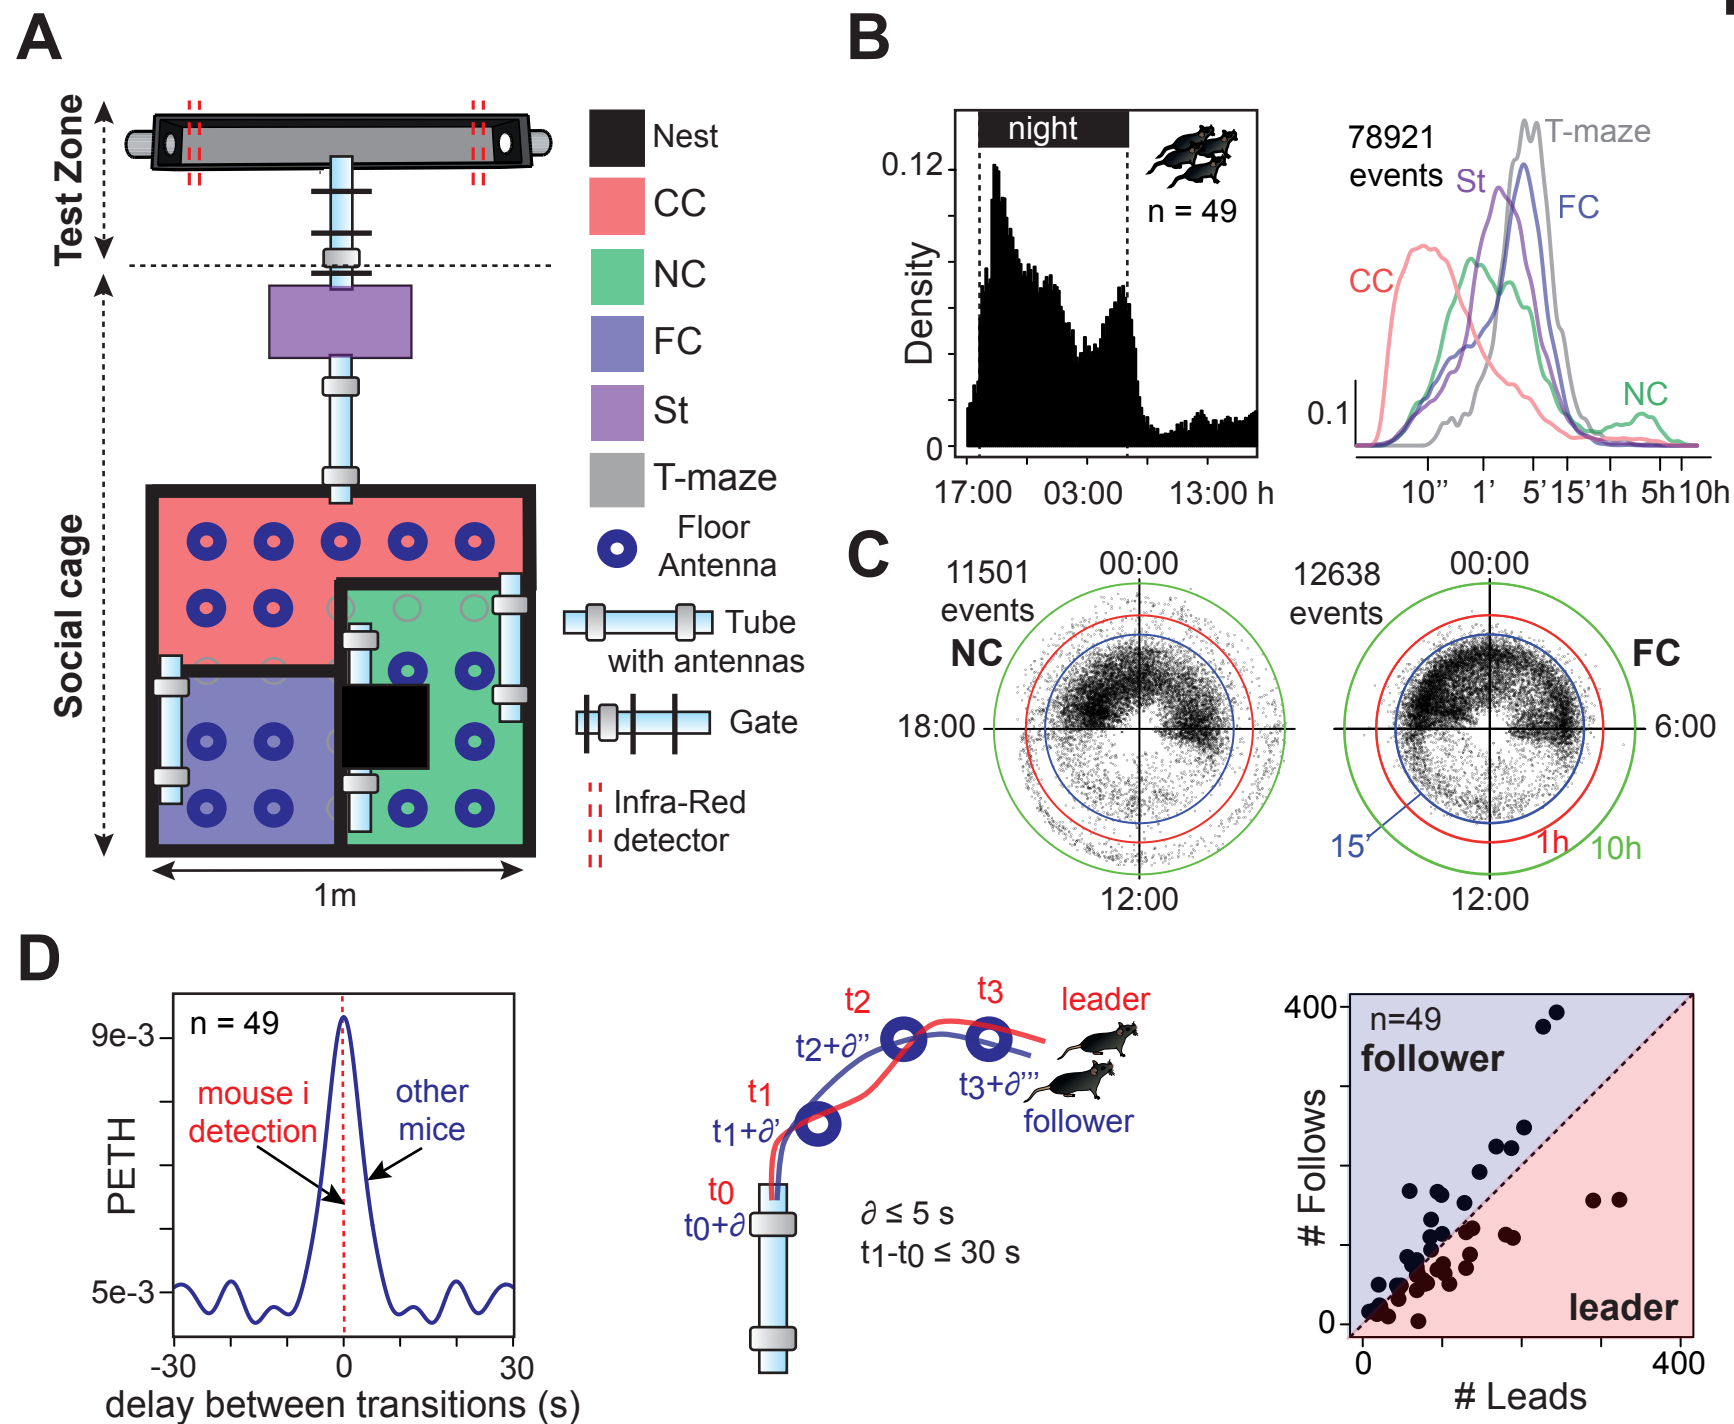

640 **Fig. 2: Consistency of behavior across situations. (A)** Example of atypical behaviors. Top:  
641 density of mice in NC. Below: Presence (=1) of two mice (#1 and #13) in NC. **(B)**  
642 Cumulative distributions of entropy (Left) and of the proportion of time spent in FC (Right).  
643 **(C)** (Left) Diagram representing the five sessions. Variation across sessions (mean±sem) of  
644 (Middle) the proportion of time spent in NC (n=18,  $F(4,68)=22.69$ ,  $p<0.001$ ; and post-hoc  
645 test) and (Right) in St (n=18,  $F(3,51)=30.52$ ,  $p<0.001$ ; and post-hoc test). **(D)** Correlation  
646 between proportion of time spent in St for individual mice in session 1 (S1) against session 2  
647 (S2) (Spearman correlation coefficient, n=18, fitted line= solid line, identity line= dotted  
648 line). Inset displays ranks instead of values with the correlation line. **(E-F)** Same as (D) inset  
649 for **(E)** the rank based on the ratio of leading over following and **(F)** the rank based on the  
650 proportion of time spent alone. **(G)**. Rank correlations ( $\rho$ ) for two consecutive periods, for  
651 ten individual and social behaviors. For (e-f-g), n=30 mice from 3 independent experiments.  
652 \*\*\* $p<0.001$ , \*\* $p<0.01$ , \* $p<0.05$ .

# Figure 2

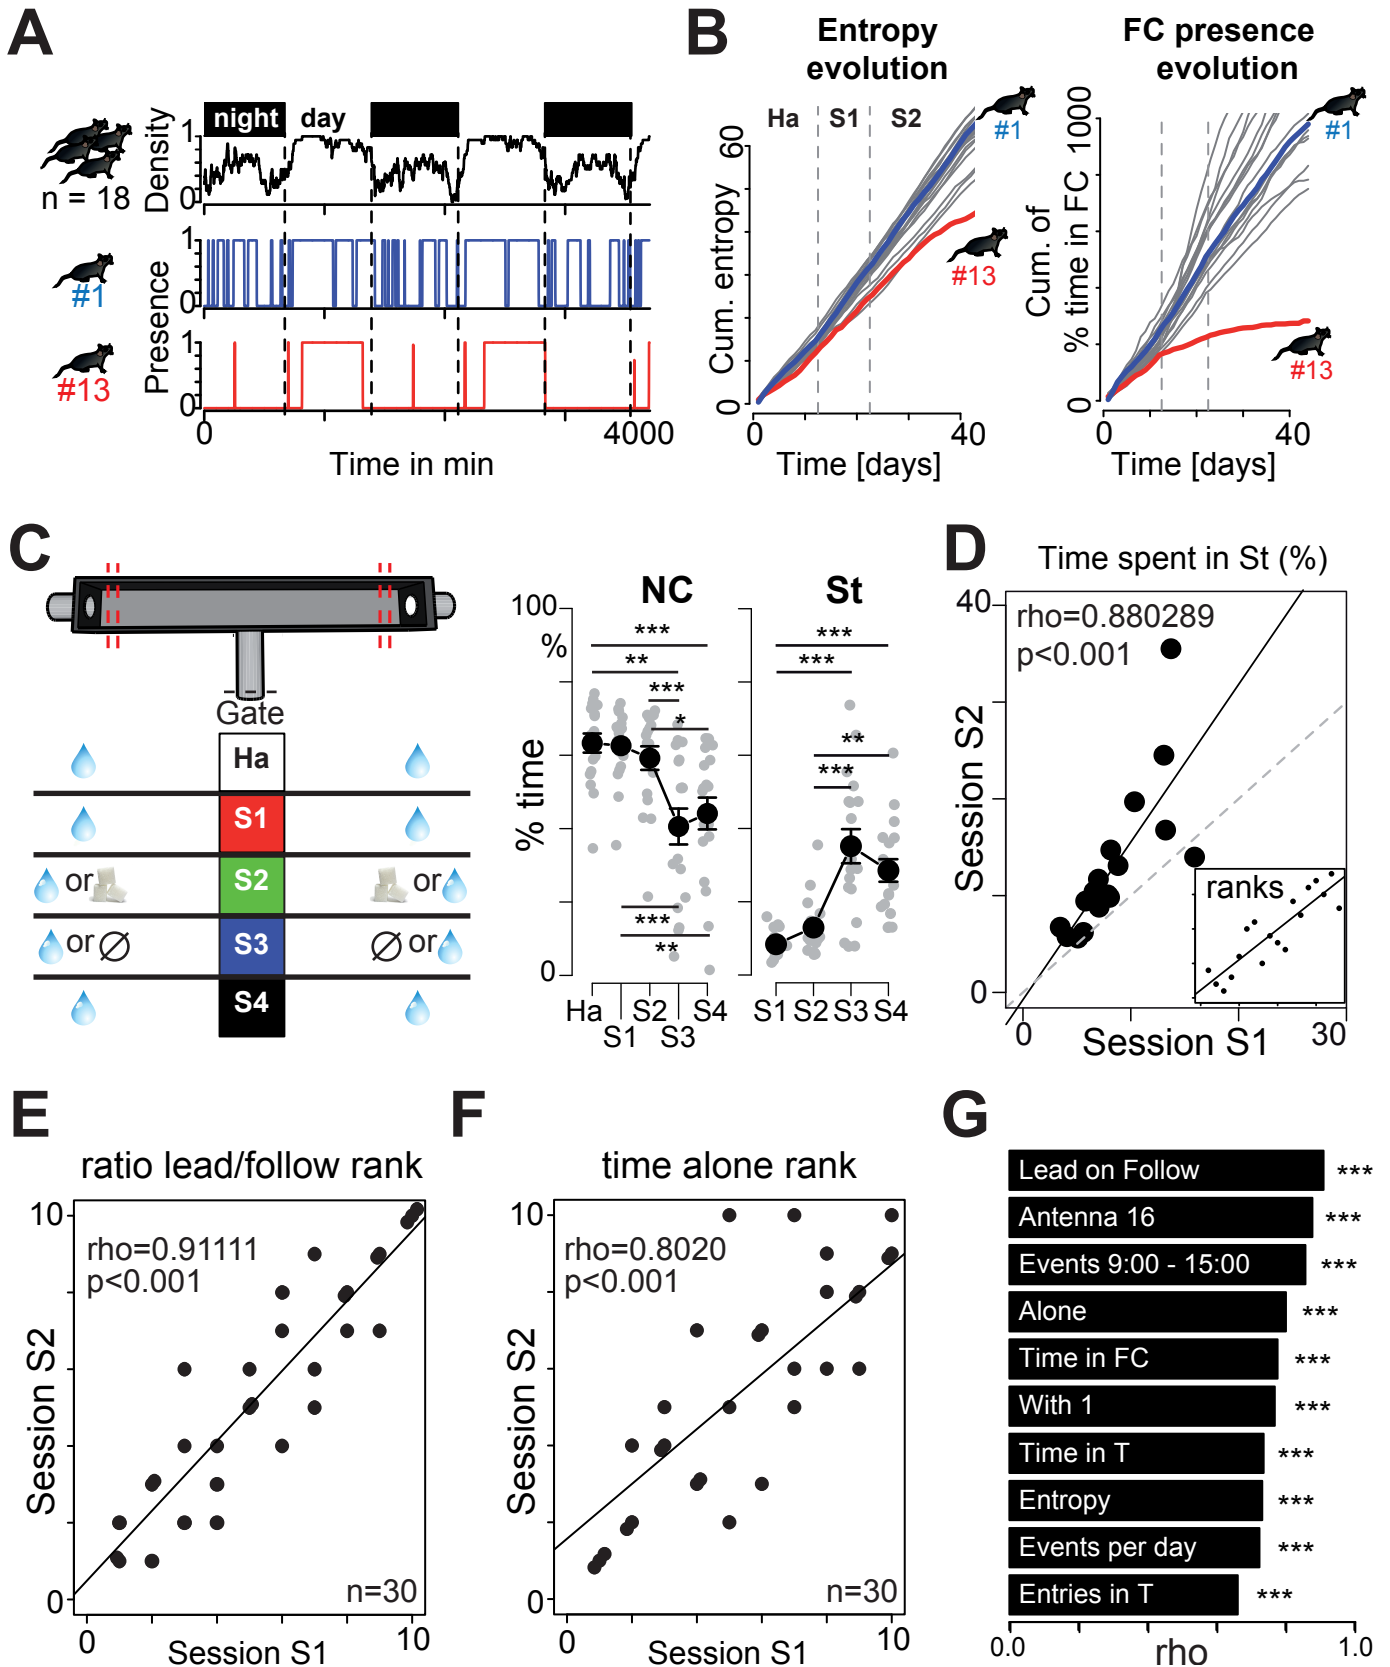

653 **Fig. 3: Decision making.** (A) T-maze occupancy (in %) on a 24h cycle. (B) Probability to  
654 choose the highest rewarded arm (A) in sessions S1, S2 and S3. For S2 and S3, the first  
655 choice corresponds to the one after the bottles have been swapped. (C) Win-Stay strategy:  
656 probability to switch side when the latest choice (in x-axis) is sucrose (S) or water (W) for S2  
657 and water (W) or nothing (N) for S3. (W=4393 and 675.5,  $p=0.0012$  and  $p<0.001$ ). (D)  
658 Cumulative left (L.) or right (R.) turns for two different mice (# i and j), upon water and  
659 sucrose bottle swapping in S2 (symbols on top, indicating bottle content on the R. side). (E)  
660 Principal component analysis based on a, SW;  $\alpha$  and  $\beta$ , (n=86 from 9 experiments) from  
661 which we clustered three different groups (G1, G2 and G3). Insets on the right show  
662 normalized plots equivalent to (D). (F) The three groups are well characterized by their  
663 difference in SW (i.e. low (LS), intermediate (IS) and high switch (HS) rates). Data (C, F) are  
664 presented as mean $\pm$ sem ; \*\*\* $p<0.001$ , \*\* $p<0.01$ , \* $p<0.05$ .

# Figure 3

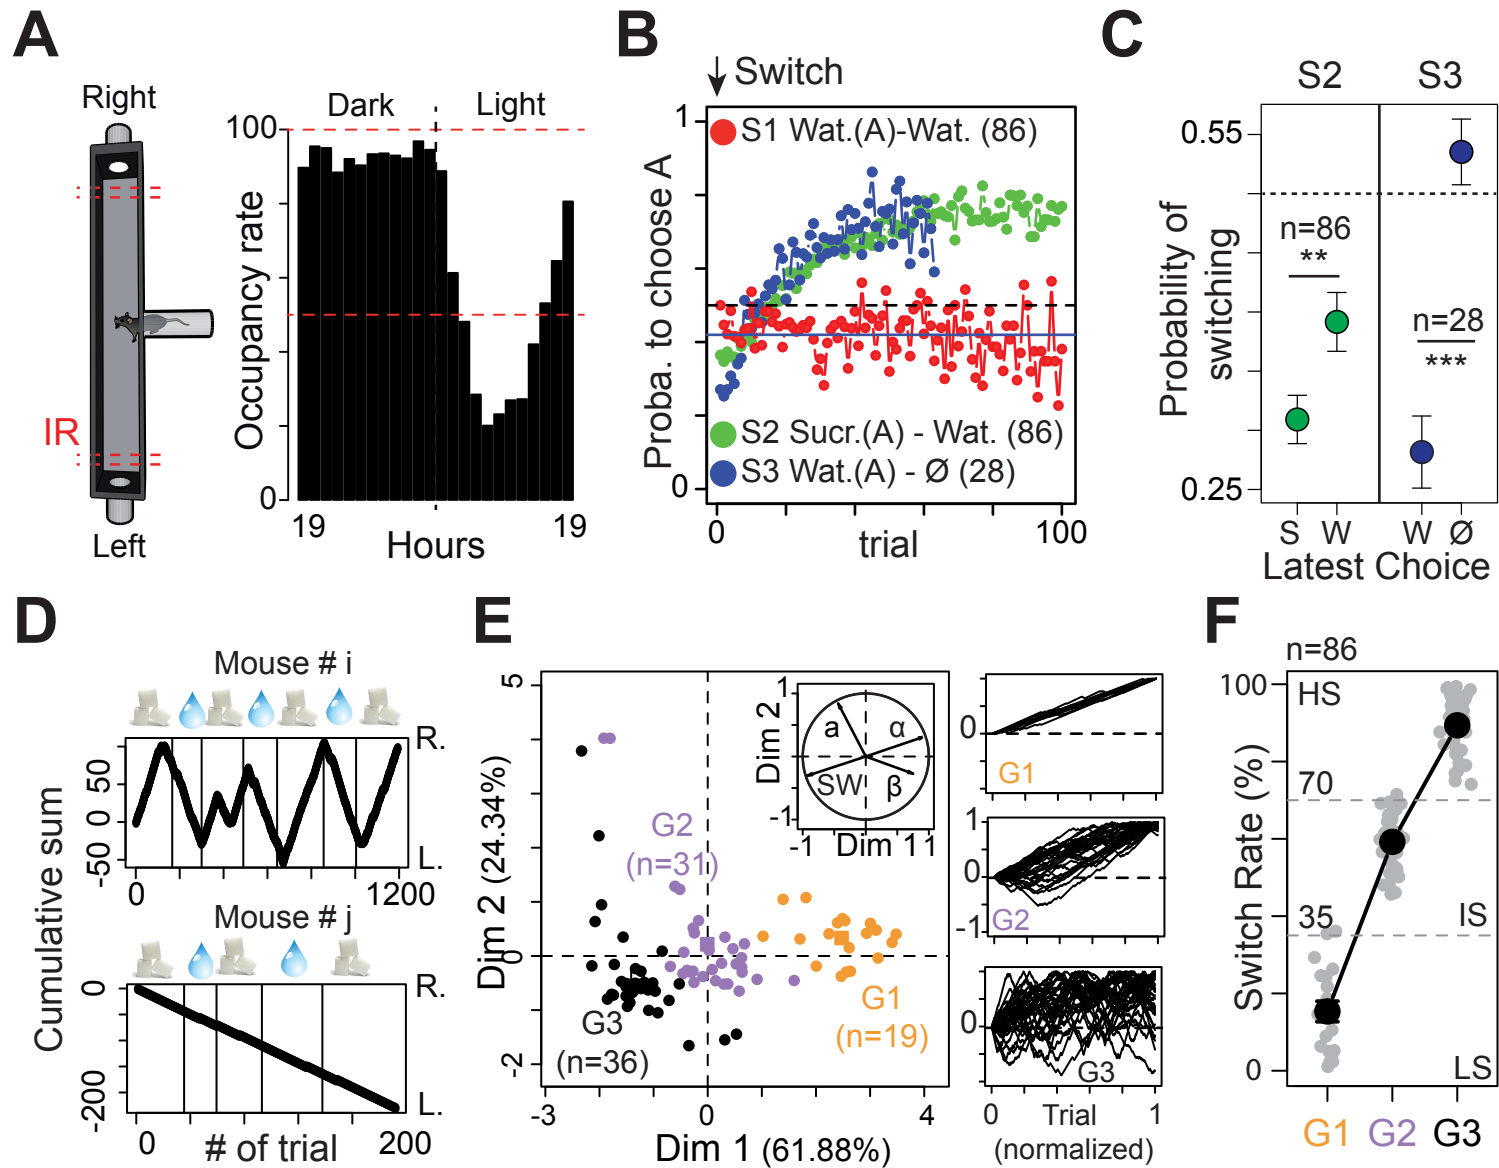

665 **Fig. 4: Correlation between specific cognitive behaviors and electrophysiological**  
666 **properties of the DA system. (A)** Different groups of mice were tracked for 5 weeks in  
667 Souris City and classified according to their SW in three groups (i.e. low (LS), intermediate  
668 (IS) and high switch (HS) rates). **(B)** Correlation of typical behaviors with SW (from 9  
669 experiments). (Left) Time between two trials in the T-maze ( $F(2, 92)=12.35$ ,  $p<0.001$ ; and  
670 Tukey post-hoc test). (Middle) Proportion of time spent in FC ( $F(2, 92)=5.827$ ,  $p=0.0041$ , and  
671 Tukey post-hoc test). (Right) Proportion of time spent with three or more conspecifics ( $F(2,$   
672  $92)=3.177$ ,  $p=0.04$ ). **(C)** (Left) Spontaneous DA cell activity in standard cages (StC) or in  
673 Souris City (SCity) (Frequency and %SWB:  $W=291920$ ,  $p<0.001$  and  $W=278010$   $p=0.015$ ).  
674 (Middle) Representative electrophysiological recordings of DA cells from LS (above) and HS  
675 mice (below). (Right) VTA DA neuron firing activity of the three groups ( $F(2, 1033)=8.667$   
676 for frequency,  $F(2, 1033)=26$  for %SWB; and Tukey post-hoc test). All data are presented as  
677 mean $\pm$ sem, \*\*\* $p<0.001$ , \*\* $p<0.01$ , \* $p<0.05$ .



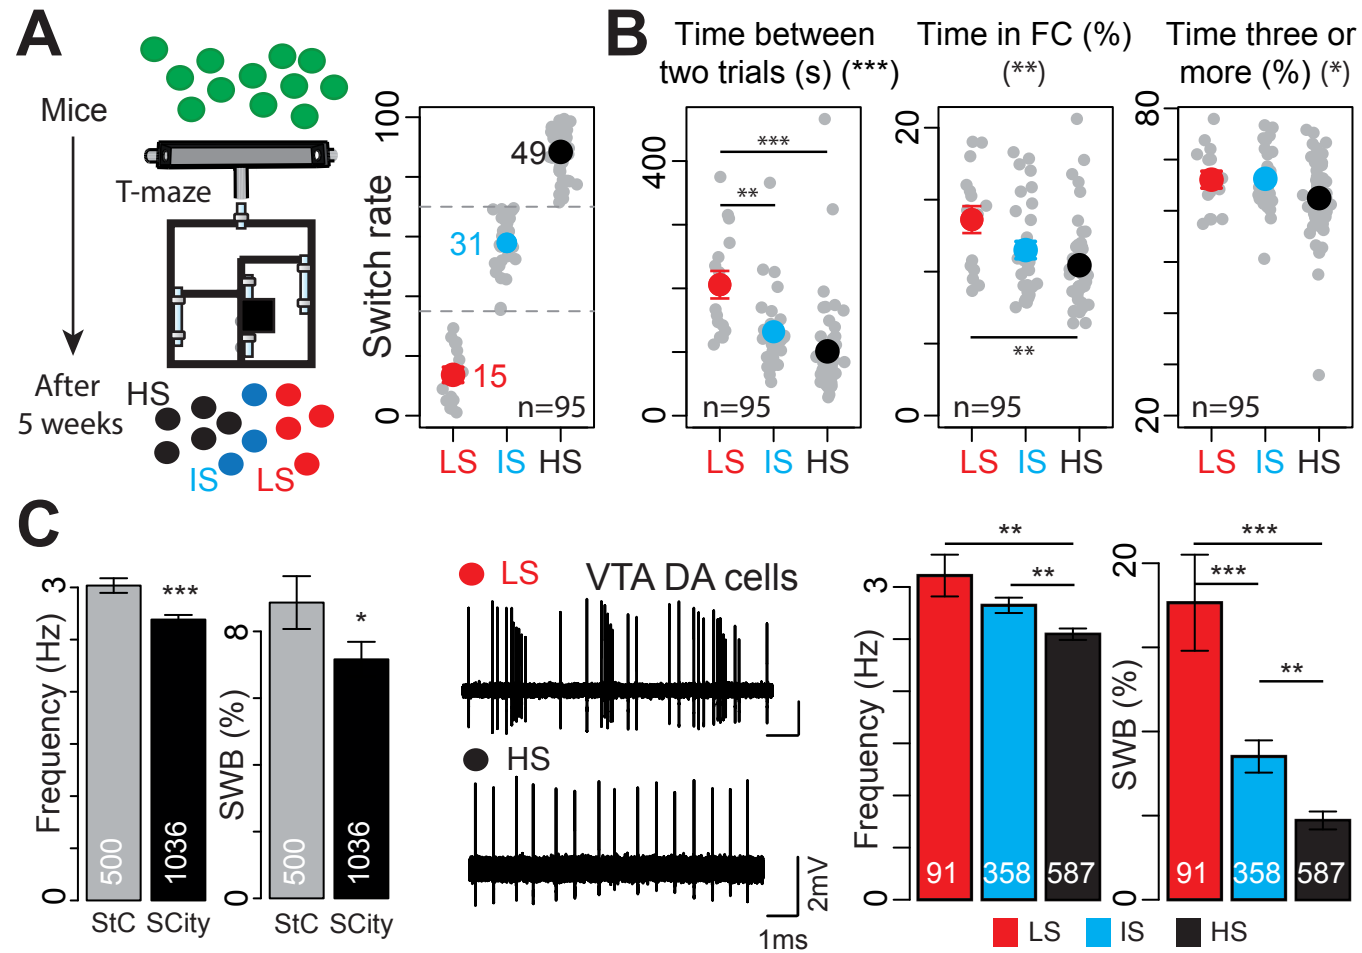

**Figure 4**

678 **Fig. 5: Influence of the group on individual behaviors and on the DA system. (A)**

679 Experimental paradigm: Two different groups of mice were studied in parallel in two Souris

680 City environments (1 and 2). After five weeks, their switching pattern were evaluated (step 1).

681 Mice from each Souris City were split in lowest (red) and highest (black) switchers. The two

682 populations were then mixed and the lowest switchers from the two environments were

683 grouped together (same for the highest switchers). After three weeks of sucrose versus water,

684 the switching patterns were reevaluated (step 2) for both residents (Res.) and incomers (Inc.).

685 **(B)** Cumulative distribution of SW for steps 1 (purple) and 2 (green) ( $D=0.2069$ ,  $p=0.57$ ). **(C)**

686 Cumulative left or right turns for two different mice upon water and sucrose bottle swapping

687 in step1 (Black) and step2 (Red). The incomer mouse #5 switched less, whereas the resident

688 mouse #6 switched more in step2 compared to step1. **(D)** Switch variation between step 1 and

689 2 ( $\Delta SW$ ) for incomers and residents (two-sample t-test,  $t(27)=2.9401$ ). **(E)** (left) No

690 difference in SW in step1 between lowest switchers of the two different Souris City, whether

691 they will be subsequently considered as incomers or residents. (Right) SW is different for the

692 same two groups after step2 (Two sample t-test ( $t=3.5914$ ,  $**p<0.01$ )) **(F)** Firing activity of

693 VTA DA neurons from incomers and residents (Frequency and SWB: two-sample Wilcoxon,

694  $W=17750$  and  $W=18319$  respectively,  $p<0.001$ ).  $***p<0.001$ ,  $**p<0.01$ ,  $*p<0.05$ .

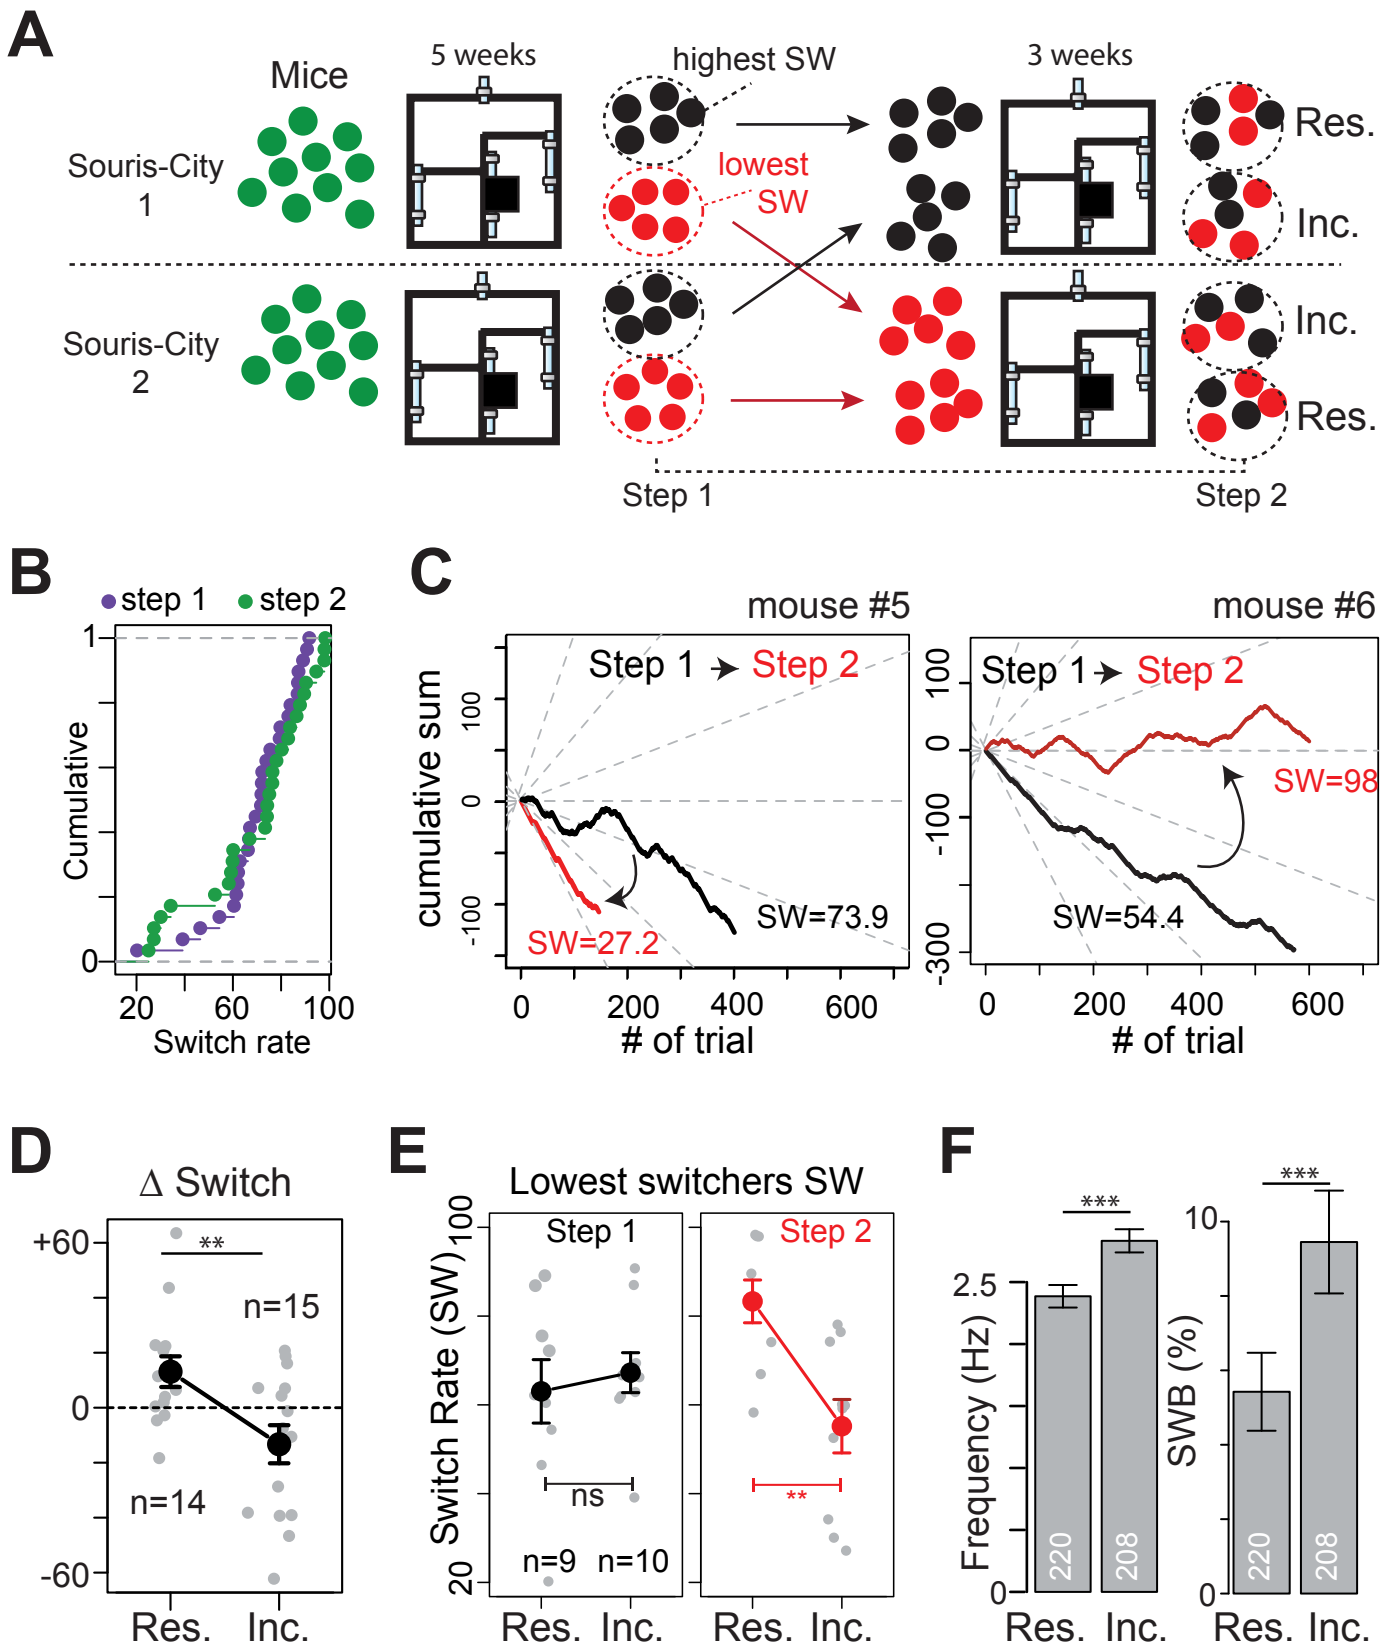

**Figure 5**
